# Supplementary material
Source: MDPI journal article supplement (https://www.mdpi.com/2075-163X/11/6/652)
Supplement: s1 [file s1]

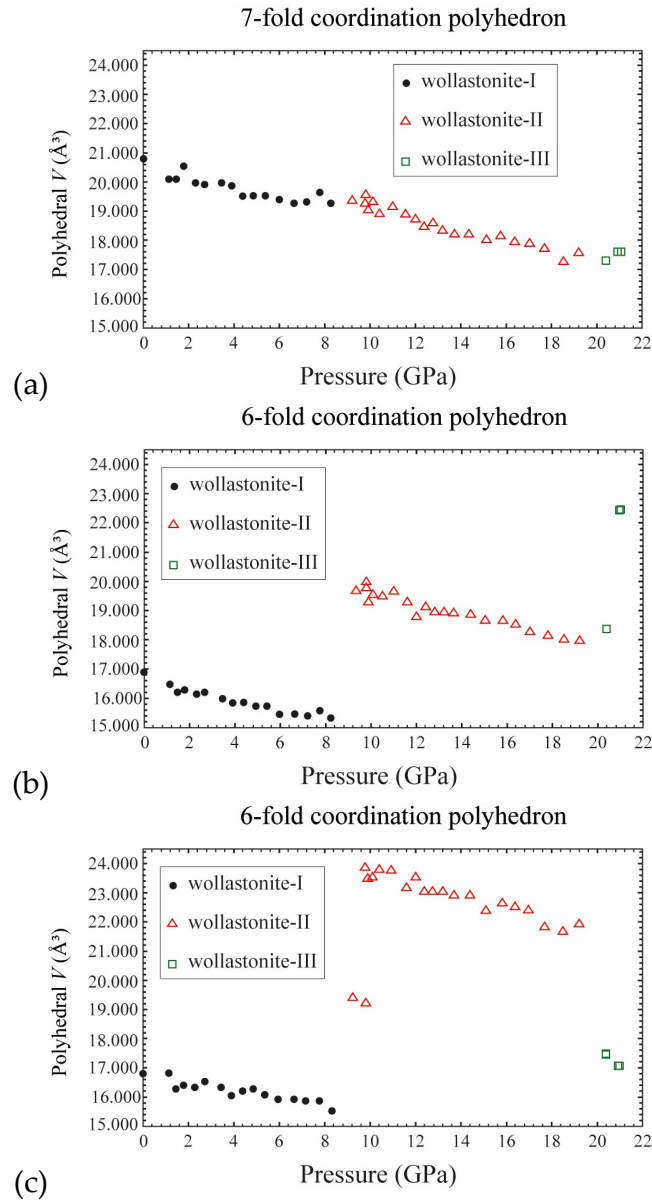

**Figure S1.** Volume change of the bigger wollastonite polyhedra. (a) 7-fold coordination polyhedron; (b,c) 6-fold coordinated polyhedron.

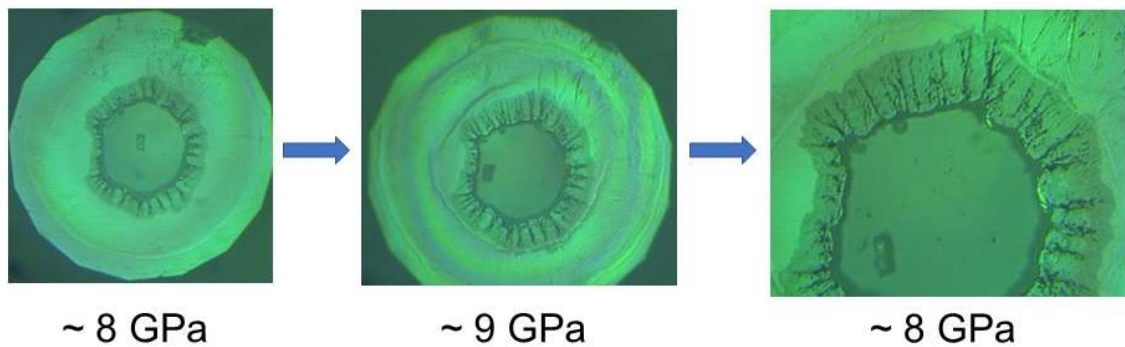

**Figure S2.** *In-situ* pictures of the pressure chamber loaded with a single crystal of  $\text{CaSiO}_3$ -walstomite, rubies as pressure standard and He as pressure transmitting medium. From the sequence of pictures, it is evident how the crystal 'jumps' from the center of the pressure chamber to the left margin. A movement is visible also in decompression.

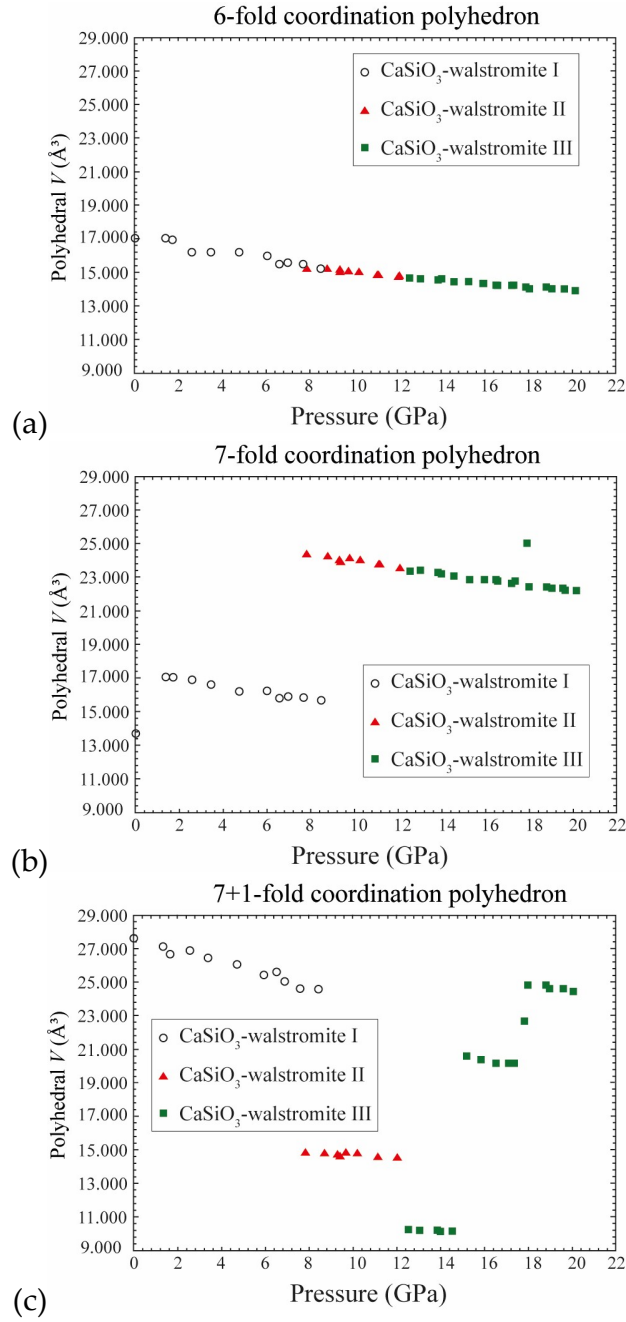

**Figure S3.** Volume change of the bigger  $\text{CaSiO}_3$ -walstromite polyhedra. (a) 6-fold coordinated polyhedron; (b) 7-fold coordination polyhedron (c) 7+1-fold coordination polyhedron

**Table S1.** Atomic coordinates, site occupancies and isotropic displacement parameters ( $\text{\AA}^2$ ) of the wollastonite studied in this work.

| Site            | <i>x</i>   | <i>y</i>   | <i>z</i>   | Site occupancies | <i>U</i> <sub>iso</sub> |
|-----------------|------------|------------|------------|------------------|-------------------------|
| wollastonite-I  |            |            |            |                  |                         |
| <i>T</i> (1)    | 0.2311(5)  | 0.1116(2)  | 0.8146(4)  | 1                | 0.0082(4)               |
| <i>T</i> (2)    | -0.2322(5) | 0.4542(2)  | 0.1861(4)  | 1                | 0.0078(4)               |
| <i>T</i> (3)    | 0.5575(5)  | 0.2233(2)  | 0.3961(4)  | 1                | 0.0084(4)               |
| <i>Ca</i> (1)   | 0.0260(4)  | 0.2503(2)  | 0.5028(3)  | 1                | 0.0093(3)               |
| <i>Ca</i> (2)   | 0.2617(4)  | -0.0772(2) | 0.1981(3)  | 1                | 0.0095(3)               |
| <i>Ca</i> (3)   | 0.2641(4)  | 0.4290(2)  | 0.2022(3)  | 1                | 0.0088(3)               |
| O(1)            | 0.304(2)   | 0.7299(6)  | 0.428(1)   | 1                | 0.0100(9)               |
| O(2)            | 0.404(2)   | 0.6300(6)  | 0.731(2)   | 1                | 0.012(1)                |
| O(3)            | 0.330(2)   | 0.2269(6)  | 0.402(1)   | 1                | 0.0087(9)               |
| O(4)            | 0.401(2)   | -0.0127(6) | 0.731(2)   | 1                | 0.0112(10)              |
| O(5)            | 0.237(2)   | 0.6321(6)  | 0.018(2)   | 1                | 0.014(1)                |
| O(6)            | 0.278(2)   | 0.3213(6)  | 0.780(2)   | 1                | 0.013(1)                |
| O(7)            | 0.034(2)   | 0.5609(6)  | 0.699(1)   | 1                | 0.0097(9)               |
| O(8)            | 0.036(2)   | 0.0387(6)  | 0.696(1)   | 1                | 0.0106(9)               |
| O(9)            | 0.238(2)   | 0.1264(6)  | 0.017(2)   | 1                | 0.012(1)                |
| wollastonite-II |            |            |            |                  |                         |
| <i>T</i> (1)    | 0.7199(9)  | 0.2180(4)  | 0.3964(4)  | 1                | 0.0073(6)               |
| <i>T</i> (2)    | 1.1905(9)  | 0.2969(4)  | 0.0884(4)  | 1                | 0.0071(6)               |
| <i>T</i> (3)    | 0.4721(9)  | -0.0262(4) | 0.3053(4)  | 1                | 0.0064(6)               |
| <i>T</i> (4)    | 0.8184(9)  | 0.1378(4)  | -0.0857(4) | 1                | 0.0086(6)               |
| <i>T</i> (5)    | 0.381(1)   | 0.5109(4)  | 0.2254(4)  | 1                | 0.0079(6)               |
| <i>T</i> (6)    | 0.7304(9)  | -0.3567(4) | 0.3977(4)  | 1                | 0.0076(6)               |
| <i>Ca</i> (1)   | 0.6327(7)  | 0.3263(3)  | 0.0961(3)  | 1                | 0.0071(5)               |
| <i>Ca</i> (2)   | 0.3753(7)  | 0.1695(3)  | -0.0959(3) | 1                | 0.0070(5)               |
| <i>Ca</i> (3)   | 1.1802(6)  | -0.3332(3) | 0.4174(2)  | 1                | 0.0048(4)               |
| <i>Ca</i> (4)   | 0.9511(7)  | 0.5183(3)  | 0.2204(3)  | 1                | 0.0073(5)               |
| <i>Ca</i> (5)   | 0.9492(6)  | 0.0113(3)  | 0.2302(2)  | 1                | 0.0068(5)               |
| <i>Ca</i> (6)   | 0.1698(6)  | 0.1701(3)  | 0.4112(2)  | 1                | 0.0058(5)               |
| O(1)            | 0.834(2)   | -0.355(1)  | 0.4894(8)  | 1                | 0.009(2)                |
| O(2)            | 0.517(2)   | 0.130(2)   | 0.3657(9)  | 1                | 0.012(2)                |
| O(3)            | 0.305(2)   | 0.351(2)   | 0.1730(9)  | 1                | 0.016(2)                |
| O(4)            | 0.192(2)   | -0.112(1)  | 0.5129(8)  | 1                | 0.009(2)                |
| O(5)            | 0.672(2)   | 0.6206(9)  | -0.0002(8) | 1                | 0.004(2)                |
| O(6)            | 0.535(2)   | -0.232(1)  | 0.3768(8)  | 1                | 0.006(2)                |
| O(7)            | 0.298(2)   | 0.714(2)   | 0.1654(9)  | 1                | 0.015(2)                |
| O(8)            | 0.684(2)   | 0.128(1)   | 0.0060(8)  | 1                | 0.008(2)                |
| O(9)            | 0.647(2)   | 0.426(1)   | 0.4080(9)  | 1                | 0.014(2)                |
| O(10)           | 0.604(2)   | 0.017(1)   | 0.2086(8)  | 1                | 0.0061(2)               |
| O(11)           | 1.217(2)   | 0.066(1)   | 0.1130(8)  | 1                | 0.010(2)                |
| O(12)           | 0.896(2)   | -0.290(1)  | 0.3160(8)  | 1                | 0.001(2)                |
| O(13)           | 0.258(2)   | 0.470(2)   | 0.3217(8)  | 1                | 0.006(2)                |
| O(14)           | 0.888(2)   | 0.229(1)   | 0.3141(8)  | 1                | 0.008(2)                |
| O(15)           | 1.048(2)   | 0.190(2)   | -0.1037(9) | 1                | 0.016(2)                |

|                             |           |           |            |   |           |
|-----------------------------|-----------|-----------|------------|---|-----------|
| O(16)                       | 0.960(2)  | 0.333(2)  | 0.1095(9)  | 1 | 0.014(2)  |
| O(17)                       | 0.239(2)  | -0.037(1) | 0.3109(8)  | 1 | 0.008(2)  |
| O(18)                       | 0.612(2)  | 0.527(1)  | 0.2043(8)  | 1 | 0.008(2)  |
| wollastonite-III            |           |           |            |   |           |
| T(1)                        | 0.192(2)  | 0.1113(4) | -0.3655(3) | 1 | 0.0085(7) |
| T(2)                        | 0.198(2)  | 0.1040(4) | 0.1401(3)  | 1 | 0.0091(7) |
| T(3)                        | 0.851(2)  | 0.2703(5) | 0.0026(3)  | 1 | 0.0100(8) |
| T(4)                        | 0.931(2)  | 0.1958(5) | -0.2393(3) | 1 | 0.0109(8) |
| <b>Table S1 (continued)</b> |           |           |            |   |           |
| T(5)                        | 1.315(2)  | 0.5783(4) | 0.1780(2)  | 1 | 0.0074(7) |
| T(6)                        | 0.947(2)  | 0.1912(5) | 0.2619(3)  | 1 | 0.0100(8) |
| T(7)                        | 0.653(2)  | 0.4346(5) | 0.3112(3)  | 1 | 0.0093(7) |
| T(8)                        | 0.854(2)  | 0.2790(5) | 0.4947(3)  | 1 | 0.0105(8) |
| T(9)                        | 0.655(2)  | 0.4375(4) | 0.1038(3)  | 1 | 0.0110(8) |
| T(10)                       | 1.210(2)  | 0.1016(5) | 0.4252(3)  | 1 | 0.0107(8) |
| T(11)                       | 0.221(2)  | 0.1134(4) | -0.0754(2) | 1 | 0.0090(7) |
| T(12)                       | 1.318(2)  | 0.5820(4) | 0.3983(3)  | 1 | 0.0098(7) |
| Ca(1)                       | 1.0808(9) | 0.4026(3) | 0.0928(2)  | 1 | 0.0093(6) |
| Ca(2)                       | 0.6748(9) | 0.0812(3) | -0.0793(2) | 1 | 0.0093(5) |
| Ca(3)                       | 0.4275(9) | 0.2811(3) | 0.2402(2)  | 1 | 0.0070(5) |
| Ca(4)                       | 0.6596(9) | 0.0817(3) | 0.4146(2)  | 1 | 0.0071(5) |
| Ca(5)                       | 0.6365(9) | 0.0838(3) | 0.1696(2)  | 1 | 0.0074(5) |
| Ca(6)                       | 0.4159(9) | 0.2801(3) | -0.2628(2) | 1 | 0.0109(6) |
| Ca(7)                       | 0.6422(9) | 0.0963(3) | -0.3391(2) | 1 | 0.0080(5) |
| Ca(8)                       | 0.4351(9) | 0.2943(3) | -0.0005(2) | 1 | 0.0124(6) |
| Ca(9)                       | 0.8768(9) | 0.6001(3) | 0.4157(2)  | 1 | 0.0092(5) |
| Ca(10)                      | 0.8758(9) | 0.6159(3) | 0.1538(2)  | 1 | 0.0104(6) |
| Ca(11)                      | 1.0752(9) | 0.4053(3) | 0.3291(2)  | 1 | 0.0094(5) |
| Ca(12)                      | 0.4307(9) | 0.2920(3) | 0.4779(2)  | 1 | 0.0107(6) |
| O(1)                        | 1.135(3)  | 0.501(1)  | 0.1864(5)  | 1 | 0.006(2)  |
| O(2)                        | 1.339(3)  | 0.007(2)  | 0.4272(6)  | 1 | 0.014(2)  |
| O(3)                        | 0.832(3)  | 0.512(1)  | 0.0527(6)  | 1 | 0.009(2)  |
| O(4)                        | 0.343(3)  | 0.026(2)  | -0.0820(7) | 1 | 0.018(2)  |
| O(5)                        | 0.686(3)  | -0.018(2) | 0.3078(6)  | 1 | 0.013(2)  |
| O(6)                        | 1.090(3)  | 0.287(2)  | 0.2422(6)  | 1 | 0.009(2)  |
| O(7)                        | 0.426(3)  | 0.403(2)  | 0.0958(7)  | 1 | 0.017(2)  |
| O(8)                        | 0.305(3)  | 0.006(2)  | 0.1976(6)  | 1 | 0.014(2)  |
| O(9)                        | 0.938(3)  | 0.704(2)  | 0.2627(6)  | 1 | 0.011(2)  |
| O(10)                       | 0.349(3)  | 0.213(1)  | -0.1087(6) | 1 | 0.011(2)  |
| O(11)                       | 0.987(3)  | 0.130(2)  | 0.1797(6)  | 1 | 0.015(2)  |
| O(12)                       | 0.804(3)  | 0.318(2)  | 0.5881(6)  | 1 | 0.013(2)  |
| O(13)                       | 1.161(3)  | 0.494(2)  | 0.4333(6)  | 1 | 0.011(2)  |
| O(14)                       | 0.761(3)  | 0.537(2)  | 0.3009(6)  | 1 | 0.012(2)  |
| O(15)                       | 1.534(3)  | 0.593(1)  | 0.4360(6)  | 1 | 0.011(2)  |
| O(16)                       | 1.086(3)  | 0.285(1)  | 0.0022(6)  | 1 | 0.011(2)  |
| O(17)                       | 0.977(3)  | 0.135(2)  | -0.3199(6) | 1 | 0.013(2)  |
| O(18)                       | 0.363(3)  | 0.192(1)  | 0.3877(6)  | 1 | 0.009(2)  |

|                             |          |          |            |   |          |
|-----------------------------|----------|----------|------------|---|----------|
| O(19)                       | 0.351(3) | 0.202(2) | -0.3752(6) | 1 | 0.010(2) |
| O(20)                       | 0.004(3) | 0.126(2) | -0.1349(6) | 1 | 0.016(2) |
| O(21)                       | 1.125(3) | 0.086(2) | 0.5343(6)  | 1 | 0.012(2) |
| O(22)                       | 0.708(3) | 0.176(1) | 0.0232(6)  | 1 | 0.008(2) |
| O(23)                       | 0.358(3) | 0.191(2) | 0.1368(6)  | 1 | 0.013(2) |
| O(24)                       | 0.419(3) | 0.405(1) | 0.3266(6)  | 1 | 0.013(2) |
| O(25)                       | 0.756(3) | 0.336(2) | 0.0691(7)  | 1 | 0.016(2) |
| O(26)                       | 1.011(3) | 0.113(2) | 0.3623(6)  | 1 | 0.014(2) |
| O(27)                       | 0.133(3) | 0.084(2) | 0.0365(6)  | 1 | 0.014(2) |
| O(28)                       | 1.337(3) | 0.606(1) | 0.2807(6)  | 1 | 0.009(2) |
| O(29)                       | 1.085(3) | 0.295(2) | 0.4775(6)  | 1 | 0.012(2) |
| O(30)                       | 0.688(3) | 0.192(1) | -0.2306(6) | 1 | 0.005(2) |
| O(31)                       | 0.760(3) | 0.363(2) | 0.4039(7)  | 1 | 0.021(2) |
| O(32)                       | 1.220(3) | 0.681(1) | 0.1106(6)  | 1 | 0.010(2) |
| O(33)                       | 0.285(3) | 0.814(2) | 0.4948(6)  | 1 | 0.012(2) |
| O(34)                       | 0.288(3) | 0.809(1) | 0.7316(6)  | 1 | 0.007(2) |
| <b>Table S1</b> (continued) |          |          |            |   |          |
| O(35)                       | 0.264(3) | 0.606(2) | 0.7806(6)  | 1 | 0.015(2) |
| O(36)                       | 0.475(3) | 0.431(2) | 0.8648(7)  | 1 | 0.017(2) |

**Table S2.** Interatomic distances (Å) selected from the structural refinement of the wollastonite studied in this work.

|                 |           |
|-----------------|-----------|
| wollastonite-I  |           |
| T(1)-O(4)       | 1.609(9)  |
| -O(6)           | 1.660(7)  |
| -O(8)           | 1.613(9)  |
| -O(9)           | 1.580(10) |
| <T(1)-O>        | 1.615     |
| T(2)-O(2)       | 1.619(11) |
| -O(5)           | 1.597(9)  |
| -O(6)           | 1.642(5)  |
| -O(7)           | 1.619(10) |
| <T(2)-O>        | 1.619     |
| T(3)-O(1)       | 1.598(9)  |
| -O(2)           | 1.675(9)  |
| -O(3)           | 1.614(10) |
| -O(4)           | 1.678(6)  |
| <T(3)-O>        | 1.641     |
| Ca(1)-O(1)      | 2.446(10) |
| -O(3)           | 2.358(10) |
| -O(6)           | 2.653(9)  |
| -O(7)           | 2.439(6)  |
| -O(7)           | 2.359(8)  |
| -O(8)           | 2.415(8)  |
| -O(8)           | 2.342(6)  |
| <Ca(1)-O>       | 2.430     |
| Ca(2)-O(1)      | 2.552(8)  |
| -O(3)           | 2.450(6)  |
| -O(4)           | 2.456(10) |
| -O(5)           | 2.269(6)  |
| -O(8)           | 2.338(10) |
| -O(9)           | 2.298(8)  |
| <Ca(2)-O>       | 2.394     |
| Ca(3)-O(1)      | 2.495(6)  |
| -O(2)           | 2.423(11) |
| -O(3)           | 2.426(8)  |
| -O(5)           | 2.311(8)  |
| -O(7)           | 2.316(10) |
| -O(9)           | 2.357(6)  |
| <Ca(3)-O>       | 2.388     |
| wollastonite-II |           |
| T(1)-O(2)       | 1.635(15) |
| -O(4)           | 1.535(13) |
| -O(9)           | 1.631(10) |
| -O(14)          | 1.609(14) |
| <T(1)-O>        | 1.603     |
| T(2)-O(3)       | 1.635(16) |
| -O(5)           | 1.559(13) |
| -O(11)          | 1.642(8)  |
| -O(16)          | 1.593(15) |
| <T(2)-O>        | 1.607     |

| Table S2 (continued) |           |
|----------------------|-----------|
| <i>T</i> (3)-O(2)    | 1.644(14) |
| -O(6)                | 1.678(10) |
| -O(10)               | 1.615(14) |
| -O(17)               | 1.559(15) |
| < <i>T</i> (3)-O>    | 1.624     |
| <i>T</i> (4)-O(7)    | 1.630(13) |
| -O(8)                | 1.585(14) |
| -O(11)               | 1.643(11) |
| -O(15)               | 1.576(15) |
| < <i>T</i> (4)-O>    | 1.608     |
| <i>T</i> (5)-O(3)    | 1.644(14) |
| -O(7)                | 1.643(10) |
| -O(13)               | 1.580(14) |
| -O(18)               | 1.562(15) |
| < <i>T</i> (5)-O>    | 1.607     |
| <i>T</i> (6)-O(1)    | 1.570(15) |
| -O(6)                | 1.593(13) |
| -O(9)                | 1.643(10) |
| -O(12)               | 1.588(14) |
| < <i>T</i> (6)-O>    | 1.599     |
| <i>Ca</i> (1)-O(3)   | 2.447(14) |
| -O(5)                | 2.530(14) |
| -O(5)                | 2.275(8)  |
| -O(8)                | 2.207(12) |
| -O(10)               | 2.459(9)  |
| -O(16)               | 2.212(15) |
| -O(18)               | 2.423(12) |
| < <i>Ca</i> (1)-O>   | 2.365     |
| <i>Ca</i> (2)-O(5)   | 2.341(12) |
| -O(7)                | 2.431(14) |
| -O(8)                | 2.605(14) |
| -O(8)                | 2.275(8)  |
| -O(10)               | 2.398(13) |
| -O(15)               | 2.203(15) |
| -O(18)               | 2.394(9)  |
| < <i>Ca</i> (2)-O>   | 2.378     |
| <i>Ca</i> (3)-O(1)   | 2.354(8)  |
| -O(1)                | 2.491(14) |
| -O(4)                | 2.396(12) |
| -O(6)                | 2.487(14) |
| -O(12)               | 2.467(14) |
| -O(13)               | 2.294(12) |
| -O(17)               | 2.366(9)  |
| < <i>Ca</i> (3)-O>   | 2.408     |
| <i>Ca</i> (4)-O(3)   | 2.797(14) |
| -O(7)                | 2.707(13) |
| -O(12)               | 2.236(12) |
| -O(13)               | 2.589(14) |
| -O(14)               | 2.252(9)  |
| -O(15)               | 2.396(10) |
| -O(16)               | 2.367(14) |
| -O(18)               | 2.294(15) |
| < <i>Ca</i> (4)-O>   | 2.455     |
| <i>Ca</i> (5)-O(10)  | 2.349(15) |



| Table S2 (continued) |           |
|----------------------|-----------|
| -O(11)               | 2.401(13) |
| -O(12)               | 2.271(8)  |
| -O(14)               | 2.263(11) |
| -O(15)               | 2.649(14) |
| -O(16)               | 2.583(9)  |
| -O(17)               | 2.319(14) |
| < Ca(5)-O >          | 2.405     |
| Ca(6)-O(1)           | 2.225(12) |
| -O(2)                | 2.424(14) |
| -O(4)                | 2.243(9)  |
| -O(4)                | 2.609(14) |
| -O(13)               | 2.318(8)  |
| -O(14)               | 2.415(14) |
| -O(17)               | 2.390(12) |
| < Ca(6)-O >          | 2.375     |
| wollastonite-III     |           |
| T(1)-O(5)            | 1.603(17) |
| -O(17)               | 1.63(2)   |
| -O(19)               | 1.619(19) |
| -O(21)               | 1.619(13) |
| <T(1)-O >            | 1.618     |
| T(2)-O(8)            | 1.598(17) |
| -O(11)               | 1.58(3)   |
| -O(23)               | 1.592(19) |
| -O(27)               | 1.634(13) |
| <T(2)-O >            | 1.602     |
| T(3)-O(16)           | 1.56(3)   |
| -O(22)               | 1.581(18) |
| -O(25)               | 1.615(18) |
| -O(32)               | 1.664(11) |
| <T(3)-O >            | 1.604     |
| T(4)-O(9)            | 1.599(18) |
| -O(17)               | 1.632(16) |
| -O(20)               | 1.651(12) |
| -O(30)               | 1.60(3)   |
| <T(4)-O >            | 1.620     |
| T(5)-O(1)            | 1.575(19) |
| -O(28)               | 1.616(12) |
| -O(32)               | 1.665(15) |
| -O(36)               | 1.53(2)   |
| <T(5)-O >            | 1.597     |
| T(6)-O(6)            | 1.598(19) |
| -O(11)               | 1.652(16) |
| -O(26)               | 1.642(12) |
| -O(34)               | 1.55(3)   |
| <T(6)-O >            | 1.610     |
| T(7)-O(14)           | 1.570(18) |
| -O(24)               | 1.58(3)   |
| -O(31)               | 1.627(15) |
| -O(35)               | 1.660(15) |
| <T(7)-O >            | 1.610     |
| T(8)-O(12)           | 1.605(14) |
| -O(29)               | 1.54(3)   |
| -O(31)               | 1.653(14) |

| Table S2 (continued) |           |
|----------------------|-----------|
| -O(33)               | 1.554(19) |
| <T(8)-O>             | 1.589     |
| T(9)-O(3)            | 1.601(18) |
| -O(7)                | 1.58(3)   |
| -O(25)               | 1.779(18) |
| -O(35)               | 1.705(12) |
| <T(9)-O>             | 1.667     |
| T(10)-O(2)           | 1.592(19) |
| -O(18)               | 1.589(18) |
| -O(21)               | 1.619(12) |
| -O(26)               | 1.577(19) |
| <T(10)-O>            | 1.594     |
| T(11)-O(4)           | 1.51(2)   |
| -O(10)               | 1.593(17) |
| -O(20)               | 1.652(19) |
| -O(27)               | 1.651(11) |
| <T(11)-O>            | 1.602     |
| T(12)-O(12)          | 1.691(19) |
| -O(13)               | 1.581(18) |
| -O(15)               | 1.54(3)   |
| -O(28)               | 1.636(10) |
| <T(12)-O>            | 1.612     |
| Ca(1)-O(1)           | 2.187(14) |
| -O(3)                | 2.198(10) |
| -O(3)                | 2.250(18) |
| -O(6)                | 2.344(11) |
| -O(7)                | 2.27(3)   |
| -O(16)               | 2.356(15) |
| -O(25)               | 2.38(2)   |
| <Ca(1)-O>            | 2.283     |
| Ca(2)-O(4)           | 2.423(11) |
| -O(4)                | 2.31(3)   |
| -O(8)                | 2.338(14) |
| -O(20)               | 2.32(2)   |
| -O(22)               | 2.227(14) |
| -O(27)               | 2.614(18) |
| -O(30)               | 2.336(10) |
| <Ca(2)-O>            | 2.3666    |
| Ca(3)-O(6)           | 2.22(3)   |
| -O(7)                | 2.339(12) |
| -O(18)               | 2.207(10) |
| -O(23)               | 2.224(15) |
| -O(24)               | 2.382(15) |
| -O(34)               | 2.264(19) |
| -O(35)               | 2.521(19) |
| <Ca(3)-O>            | 2.308     |
| Ca(4)-O(2)           | 2.298(10) |
| -O(2)                | 2.32(2)   |
| -O(5)                | 2.332(15) |
| -O(18)               | 2.490(19) |
| -O(21)               | 2.732(18) |
| -O(26)               | 2.42(2)   |
| -O(33)               | 2.225(15) |
| -O(34)               | 2.289(10) |

| Table S2 (continued) |           |
|----------------------|-----------|
| <Ca(4)-O>            | 2.389     |
| Ca(5)-O(4)           | 2.229(17) |
| -O(5)                | 2.163(11) |
| -O(8)                | 2.41(2)   |
| -O(11)               | 2.39(3)   |
| -O(22)               | 2.216(10) |
| -O(23)               | 2.373(19) |
| -O(34)               | 2.363(15) |
| <Ca(5)-O>            | 2.306     |
| Ca(6)-O(9)           | 2.34(3)   |
| -O(10)               | 2.211(10) |
| -O(14)               | 2.790(17) |
| -O(15)               | 2.687(10) |
| -O(19)               | 2.202(14) |
| -O(28)               | 2.235(18) |
| -O(30)               | 2.181(19) |
| <Ca(6)-O>            | 2.378     |
| Ca(7)-O(2)           | 2.162(15) |
| -O(5)                | 2.39(2)   |
| -O(8)                | 2.208(11) |
| -O(17)               | 2.29(3)   |
| -O(19)               | 2.431(19) |
| -O(30)               | 2.322(14) |
| -O(33)               | 2.317(10) |
| <Ca(7)-O>            | 2.303     |
| Ca(8)-O(7)           | 2.313(16) |
| -O(10)               | 2.213(14) |
| -O(16)               | 2.29(3)   |
| -O(22)               | 2.446(19) |
| -O(23)               | 2.186(11) |
| -O(25)               | 2.454(19) |
| -O(32)               | 2.725(18) |
| -O(36)               | 2.375(12) |
| <Ca(8)-O>            | 2.376     |
| Ca(9)-O(9)           | 2.342(10) |
| -O(12)               | 2.37(2)   |
| -O(13)               | 2.40(2)   |
| -O(13)               | 2.245(10) |
| -O(14)               | 2.189(15) |
| -O(15)               | 2.27(3)   |
| -O(29)               | 2.397(15) |
| <Ca(9)-O>            | 2.315     |
| Ca(10)-O(1)          | 2.342(19) |
| -O(3)                | 2.319(14) |
| -O(9)                | 2.262(15) |
| -O(10)               | 2.795(17) |
| -O(14)               | 2.244(11) |
| -O(16)               | 2.332(10) |
| -O(32)               | 2.44(2)   |
| -O(36)               | 2.42(3)   |
| <Ca(10)-O>           | 2.395     |
| Ca(11)-O(1)          | 2.181(9)  |
| -O(6)                | 2.324(16) |
| -O(13)               | 2.239(15) |

| Table S2 (continued) |           |
|----------------------|-----------|
| -O(14)               | 2.769(19) |
| -O(24)               | 2.26(3)   |
| -O(29)               | 2.304(10) |
| -O(31)               | 2.328(19) |
| -O(35)               | 2.753(18) |
| <Ca(11)-O>           | 2.395     |
| Ca(12)-O(15)         | 2.282(15) |
| -O(18)               | 2.182(15) |
| -O(19)               | 2.222(11) |
| -O(24)               | 2.347(10) |
| -O(29)               | 2.27(3)   |
| -O(31)               | 2.486(19) |
| -O(33)               | 2.39(2)   |
| <Ca(12)-O>           | 2.311     |

**Table S3.** Atomic coordinates, site occupancies and isotropic displacement parameters ( $\text{\AA}^2$ ) of the  $\text{CaSiO}_3$ -walstromite studied in this work.

| Site                                | <i>x</i>    | <i>y</i>   | <i>z</i>   | Site occupancies | <i>U</i> <sub>iso</sub> |
|-------------------------------------|-------------|------------|------------|------------------|-------------------------|
| CaSiO <sub>3</sub> -walstromite-I   |             |            |            |                  |                         |
| <i>T</i> (1)                        | 0.6076(3)   | 0.3377(4)  | 0.2930(9)  | 1                | 0.0066(5)               |
| <i>T</i> (2)                        | 0.2705(3)   | 0.7729(4)  | -0.0137(9) | 1                | 0.0082(5)               |
| <i>T</i> (3)                        | -0.0424(3)  | 0.9775(5)  | 0.3015(9)  | 1                | 0.0087(5)               |
| <i>Ca</i> (1)                       | 0.0752(2)   | 0.4203(3)  | 0.3355(7)  | 1                | 0.0087(4)               |
| <i>Ca</i> (2)                       | 0.5852(3)   | 0.2296(4)  | 0.6498(7)  | 1                | 0.0126(4)               |
| <i>Ca</i> (3)                       | 0.2369(3)   | 0.2557(3)  | 0.0009(7)  | 1                | 0.0106(4)               |
| O(1)                                | 0.1289(9)   | 0.599(2)   | 0.062(2)   | 1                | 0.009(2)                |
| O(2)                                | 0.614(1)    | 0.160(2)   | 0.899(2)   | 1                | 0.014(2)                |
| O(3)                                | 0.1396(9)   | 0.112(2)   | 0.260(2)   | 1                | 0.010(2)                |
| O(4)                                | 0.0411(9)   | 0.728(2)   | 0.407(2)   | 1                | 0.011(2)                |
| O(5)                                | 0.4511(9)   | 0.690(2)   | -0.132(2)  | 1                | 0.011(2)                |
| O(6)                                | -0.2660(9)  | 0.527(2)   | 0.258(2)   | 1                | 0.013(2)                |
| O(7)                                | -0.1356(9)  | 0.994(2)   | 0.141(2)   | 1                | 0.012(2)                |
| O(8)                                | 0.4163(9)   | 0.380(2)   | 0.406(2)   | 1                | 0.012(2)                |
| O(9)                                | -0.2456(9)  | 1.094(2)   | 0.390(2)   | 1                | 0.011(2)                |
| CaSiO <sub>3</sub> -walstromite-II  |             |            |            |                  |                         |
| <i>T</i> (1)                        | 0.2325(2)   | 0          | 0.5270(2)  | 1                | 0.0048(4)               |
| <i>T</i> (2)                        | 0.1318(2)   | 0.3170(2)  | 0.1835(2)  | 1                | 0.0051(3)               |
| <i>Ca</i> (1)                       | 0.3326(2)   | 0          | 0.1754(2)  | 1                | 0.0066(4)               |
| <i>Ca</i> (2)                       | 0.5         | -0.2389(2) | 0.5        | 1                | 0.0064(4)               |
| <i>Ca</i> (3)                       | 0.0538(2)   | 0          | -0.1530(2) | 1                | 0.0080(4)               |
| O(1)                                | 0.3589(6)   | 0          | 0.4525(6)  | 1                | 0.010(2)                |
| O(2)                                | 0.1512(4)   | 0.1641(6)  | 0.0753(5)  | 1                | 0.0095(8)               |
| O(3)                                | 0.3566(6)   | 0          | -0.0926(6) | 1                | 0.007(1)                |
| O(4)                                | -0.0875(6)  | 0          | -0.4047(6) | 1                | 0.008(1)                |
| O(5)                                | 0.2375(4)   | 0.1628(5)  | 0.6538(4)  | 1                | 0.0061(7)               |
| O(6)                                | 0.4941(4)   | -0.1981(5) | 0.2369(5)  | 1                | 0.0079(8)               |
| CaSiO <sub>3</sub> -walstromite-III |             |            |            |                  |                         |
| <i>T</i> (1)                        | 0.5278(2)   | 0.0013(3)  | 0.2323(2)  | 1                | 0.0057(3)               |
| <i>T</i> (2)                        | 0.1848(2)   | -0.3110(2) | 0.1304(2)  | 1                | 0.0060(4)               |
| <i>T</i> (3)                        | 0.1776(2)   | -0.8202(2) | 0.6334(2)  |                  | 0.0071(4)               |
| <i>Ca</i> (1)                       | 0.17724(12) | 0.0015(2)  | 0.3321(2)  | 1                | 0.0081(2)               |
| <i>Ca</i> (2)                       | 0.49632(16) | 0.2393(2)  | 0.5006(2)  | 1                | 0.0074(2)               |
| <i>Ca</i> (3)                       | -0.1542(2)  | 0.0034(2)  | 0.0606(2)  | 1                | 0.0088(2)               |
| O(1)                                | 0.4551(4)   | 0.0023(6)  | 0.3596(4)  | 1                | 0.0089(7)               |
| O(2)                                | 0.0817(5)   | -0.1488(6) | 0.1414(5)  | 1                | 0.0105(9)               |
| O(3)                                | 0.0628(5)   | -0.6772(6) | 0.6618(5)  | 1                | 0.0098(9)               |
| O(4)                                | -0.0903(4)  | 0.0072(7)  | 0.3571(4)  | 1                | 0.0095(7)               |
| O(5)                                | -0.4049(4)  | -0.0013(6) | -0.0858(4) | 1                | 0.0095(7)               |
| O(6)                                | 0.6569(5)   | -0.1599(6) | 0.2351(5)  | 1                | 0.0076(9)               |
| O(7)                                | 0.3468(5)   | 0.6671(6)  | 0.2640(5)  | 1                | 0.0092(9)               |
| O(8)                                | 0.2302(5)   | 0.2015(5)  | 0.4952(5)  | 1                | 0.0096(9)               |
| O(9)                                | 0.2419(5)   | -0.3033(5) | 0.9932(4)  | 1                | 0.0091(9)               |

**Table S4.** Interatomic distances (Å) selected from the structural refinement of the CaSiO<sub>3</sub>-walstromite studied in this work.

|                                    |           |
|------------------------------------|-----------|
| CaSiO <sub>3</sub> -walstromite-I  |           |
| T(1)-O(5)                          | 1.66(3)   |
| -O(6)                              | 1.605(9)  |
| -O(8)                              | 1.592(14) |
| -O(9)                              | 1.682(8)  |
| <T(1)-O>                           | 1.636     |
| T(2)-O(1)                          | 1.592(8)  |
| -O(2)                              | 1.610(18) |
| -O(5)                              | 1.665(15) |
| -O(7)                              | 1.709(11) |
| <T(2)-O>                           | 1.644     |
| T(3)-O(3)                          | 1.612(8)  |
| -O(4)                              | 1.610(9)  |
| -O(7)                              | 1.64(2)   |
| -O(9)                              | 1.675(13) |
| <T(3)-O>                           | 1.633     |
| Ca(1)-O(1)                         | 2.430(18) |
| -O(3)                              | 2.332(14) |
| -O(4)                              | 2.369(17) |
| -O(4)                              | 2.330(14) |
| -O(6)                              | 2.323(9)  |
| -O(8)                              | 2.355(10) |
| <Ca(1)-O>                          | 2.357     |
| Ca(2)-O(2)                         | 2.22(2)   |
| -O(3)                              | 2.507(7)  |
| -O(4)                              | 2.542(7)  |
| -O(6)                              | 2.608(11) |
| -O(8)                              | 2.480(9)  |
| -O(8)                              | 2.416(17) |
| <Ca(2)-O>                          | 2.462     |
| Ca(3)-O(1)                         | 2.446(8)  |
| -O(1)                              | 2.480(13) |
| -O(2)                              | 2.591(10) |
| -O(2)                              | 2.585(8)  |
| -O(3)                              | 2.340(17) |
| -O(5)                              | 2.672(14) |
| -O(6)                              | 2.353(16) |
| -O(7)                              | 2.689(17) |
| <Ca(3)-O>                          | 2.520     |
| CaSiO <sub>3</sub> -walstromite-II |           |
| T(1)-O(1)                          | 1.587(7)  |
| -O(4)                              | 1.577(6)  |
| -O(5)(x2)                          | 1.685(5)  |
| <T(1)-O>                           | 1.633     |
| T(2)-O(2)                          | 1.575(5)  |
| -O(3)                              | 1.669(4)  |
| -O(5)                              | 1.672(4)  |
| -O(6)                              | 1.596(5)  |
| <T(2)-O>                           | 1.628     |

**Table S4** (continued)

|                                          |          |
|------------------------------------------|----------|
| <i>Ca</i> (1)-O(1)                       | 2.333(6) |
| -O(2)(x2)                                | 2.244(5) |
| -O(3)                                    | 2.386(6) |
| -O(6)(x2)                                | 2.241(5) |
| < <i>Ca</i> (1)-O>                       | 2.282    |
| <i>Ca</i> (2)-O(1)(x2)                   | 2.352(4) |
| -O(4)(x2)                                | 2.481(4) |
| -O(5)(x2)                                | 2.563(4) |
| -O(6) (x2)                               | 2.276(5) |
| < <i>Ca</i> (2)-O>                       | 2.418    |
| <i>Ca</i> (3)-O(2)(x2)                   | 2.352(5) |
| -O(2)(x2)                                | 2.696(5) |
| -O(3)                                    | 3.001(7) |
| -O(4)                                    | 2.269(5) |
| -O(6)(x2)                                | 2.514(5) |
| < <i>Ca</i> (3)-O>                       | 2.549    |
| <b>CaSiO<sub>3</sub>-walstromite-III</b> |          |
| <i>T</i> (1)-O(1)                        | 1.563(5) |
| -O(5)                                    | 1.577(4) |
| -O(6)                                    | 1.672(6) |
| -O(7)                                    | 1.678(6) |
| < <i>T</i> (1)-O>                        | 1.623    |
| <i>T</i> (2)-O(2)                        | 1.567(5) |
| -O(4)                                    | 1.660(6) |
| -O(7)                                    | 1.672(5) |
| -O(9)                                    | 1.582(5) |
| < <i>T</i> (2)-O>                        | 1.620    |
| <i>T</i> (3)-O(3)                        | 1.563(6) |
| -O(4)                                    | 1.660(6) |
| -O(6)                                    | 1.677(5) |
| -O(8)                                    | 1.580(6) |
| < <i>T</i> (3)-O>                        | 1.620    |
| <i>Ca</i> (1)-O(1)                       | 2.309(4) |
| -O(2)                                    | 2.227(5) |
| -O(3)                                    | 2.224(5) |
| -O(4)                                    | 2.355(4) |
| -O(8)                                    | 2.236(5) |
| -O(9)                                    | 2.216(5) |
| < <i>Ca</i> (1)-O>                       | 2.261    |
| <i>Ca</i> (2)-O(1)                       | 2.314(5) |
| -O(1)                                    | 2.338(5) |
| -O(5)                                    | 2.465(5) |
| -O(5)                                    | 2.417(5) |
| -O(6)                                    | 2.529(5) |
| -O(7)                                    | 2.519(5) |
| -O(8)                                    | 2.271(5) |
| -O(9)                                    | 2.238(5) |
| < <i>Ca</i> (2)-O>                       | 2.386    |
| <i>Ca</i> (3)-O(2)                       | 2.547(6) |
| -O(2)                                    | 2.299(5) |
| -O(3)                                    | 2.925(6) |
| -O(3)                                    | 2.313(5) |

**Table S4** (continued)

|           |          |
|-----------|----------|
| -O(4)     | 2.902(5) |
| -O(5)     | 2.262(4) |
| -O(6)     | 2.965(6) |
| -O(7)     | 2.995(6) |
| -O(8)     | 2.484(5) |
| -O(9)     | 2.276(5) |
| <Ca(3)-O> | 2.618    |
